# Supplementary material for: Dynamics of histone acetylation during human early embryogenesis
Source: PubMed Central journal article supplement (PMC10011383; doi:10.1038/s41421-022-00514-y), 2023-03-14
Supplement: 41421_2022_514_MOESM1_ESM.pdf [file 41421_2022_514_MOESM1_ESM.pdf]

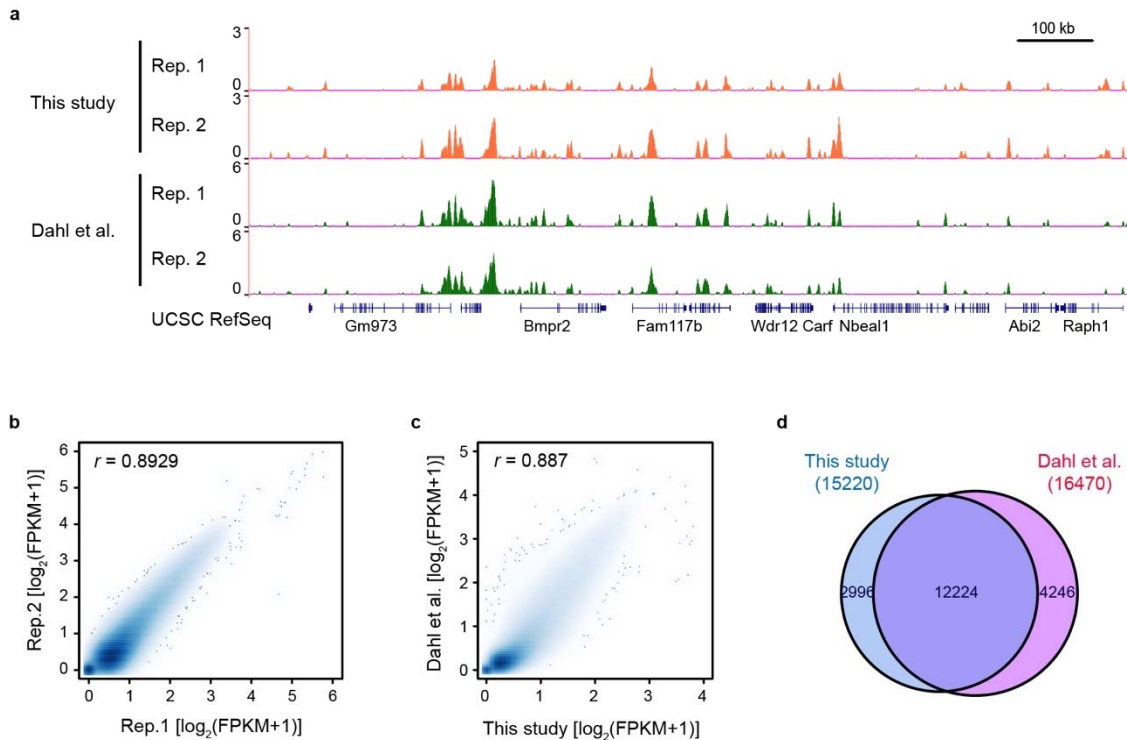

1  
2  
3  
4  
5  
6  
7  
8  
9  
10  
11  
12  
13  
14  
15  
16

**Supplementary Fig. S1 A low-input ChIP-seq method.** **a** Genome browser snapshot of H3K27ac enrichment for mouse 8-cell embryos by a low-input ChIP-seq method using in this study. Seven mouse 8-cell embryos were used for each replicate. The published H3K27ac ChIP-seq data (Dahl et al. *Nature*. 2016) for mouse 8-cell embryos using 500 cells are used for comparison. **b** Scatter plot showing the correlation of H3K27ac signal between two replicates for mouse 8-cell embryos. The data were obtained by using the low-input ChIP-seq method. Pearson correlation coefficient ( $r$ ) was calculated using FPKM values of each 5-kb window for the entire genome. **c** Scatter plot showing the correlation between H3K27ac signal of mouse 8-cell embryos detected by our low-input ChIP-seq method and that reported in the previous work (Dahl et al. *Nature*. 2016). Pearson correlation coefficient ( $r$ ) is shown. **d** Venn diagram showing the number of overlapping H3K27ac peaks detected between our low-input ChIP-seq method and the published data for mouse 8-cell embryos.

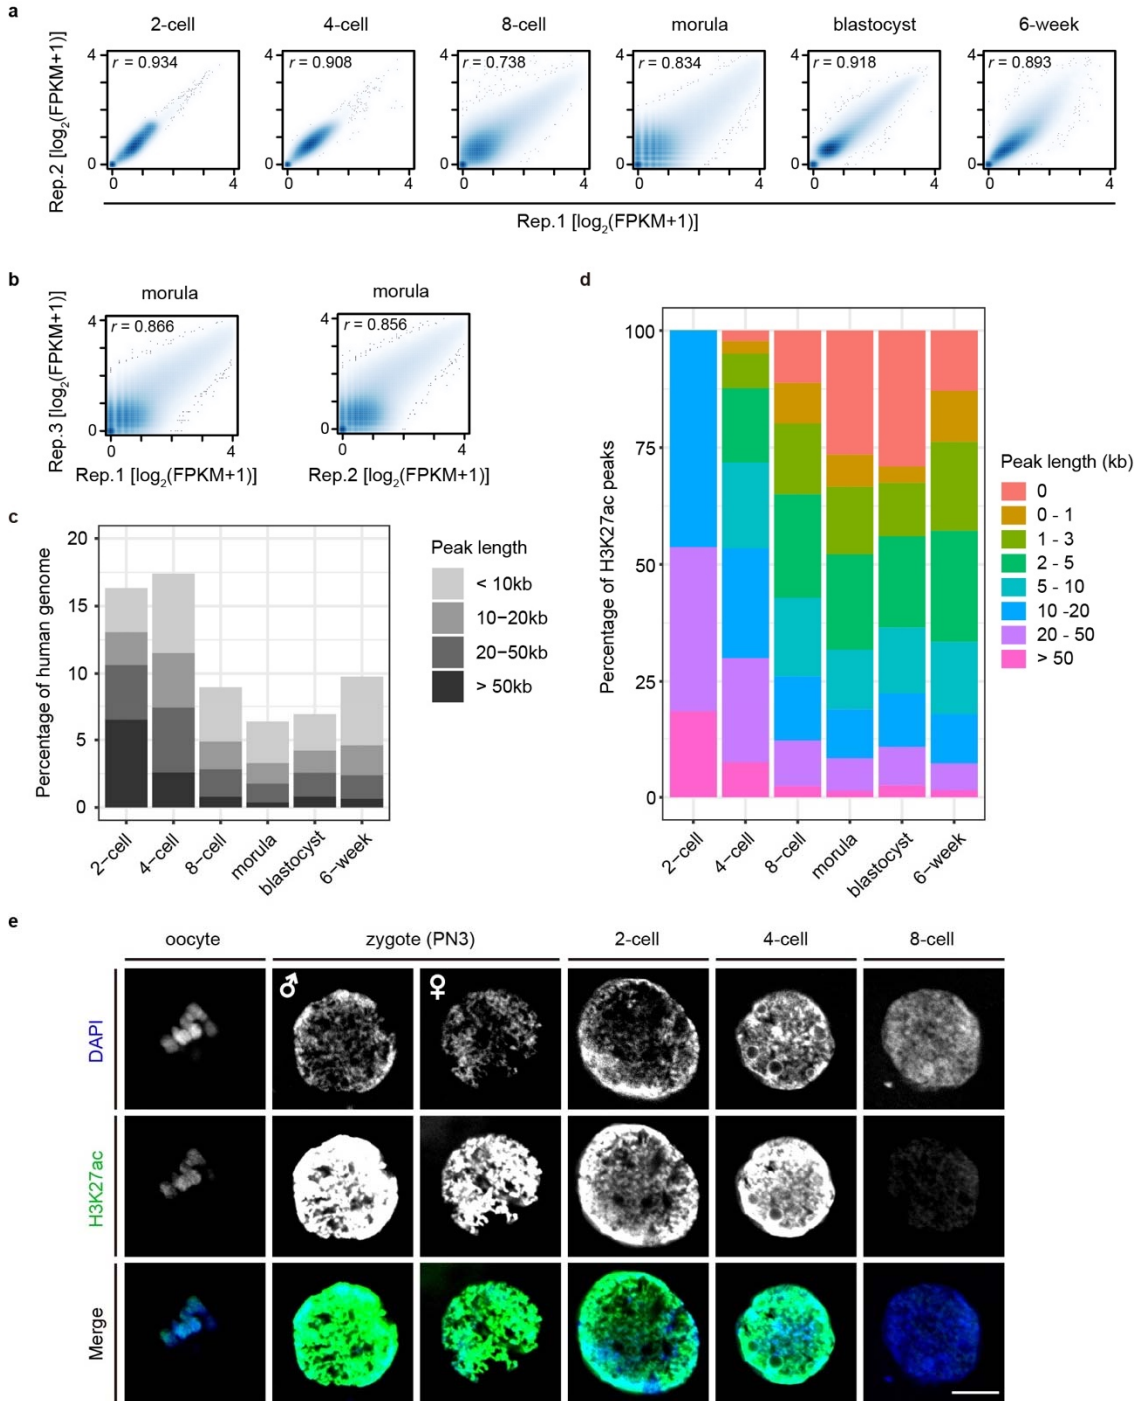

1

2 **Supplementary Fig. S2 Broad H3K27ac domains in human early embryos. a**

3 Scatter plot showing the correlation of H3K27ac signal between two replicates for

4 human early embryos. Pearson correlation coefficients ( $r$ ) were indicated. **b**

5 Scatter plot showing the correlation of H3K27ac signal between two replicates for

6 human morulae. **c** Percentages of human genome covered by H3K27ac peaks

7 with different ranges of peak lengths in human early embryos. **d** Percentages of

8 H3K27ac peaks with different ranges of peak lengths at each stage in human early

1 embryos. **e** Immunostaining of H3K27ac in human oocytes and early embryos.  
2 DNA is stained by DAPI (blue). H3K27ac signal is shown in green color. The  
3 representative images of 2 independent experiments are shown. Each panel  
4 indicate the DAPI or H3K27ac signal in a nucleus of oocyte or blastomere in  
5 human. Scale bar, 10  $\mu$ m.  
6

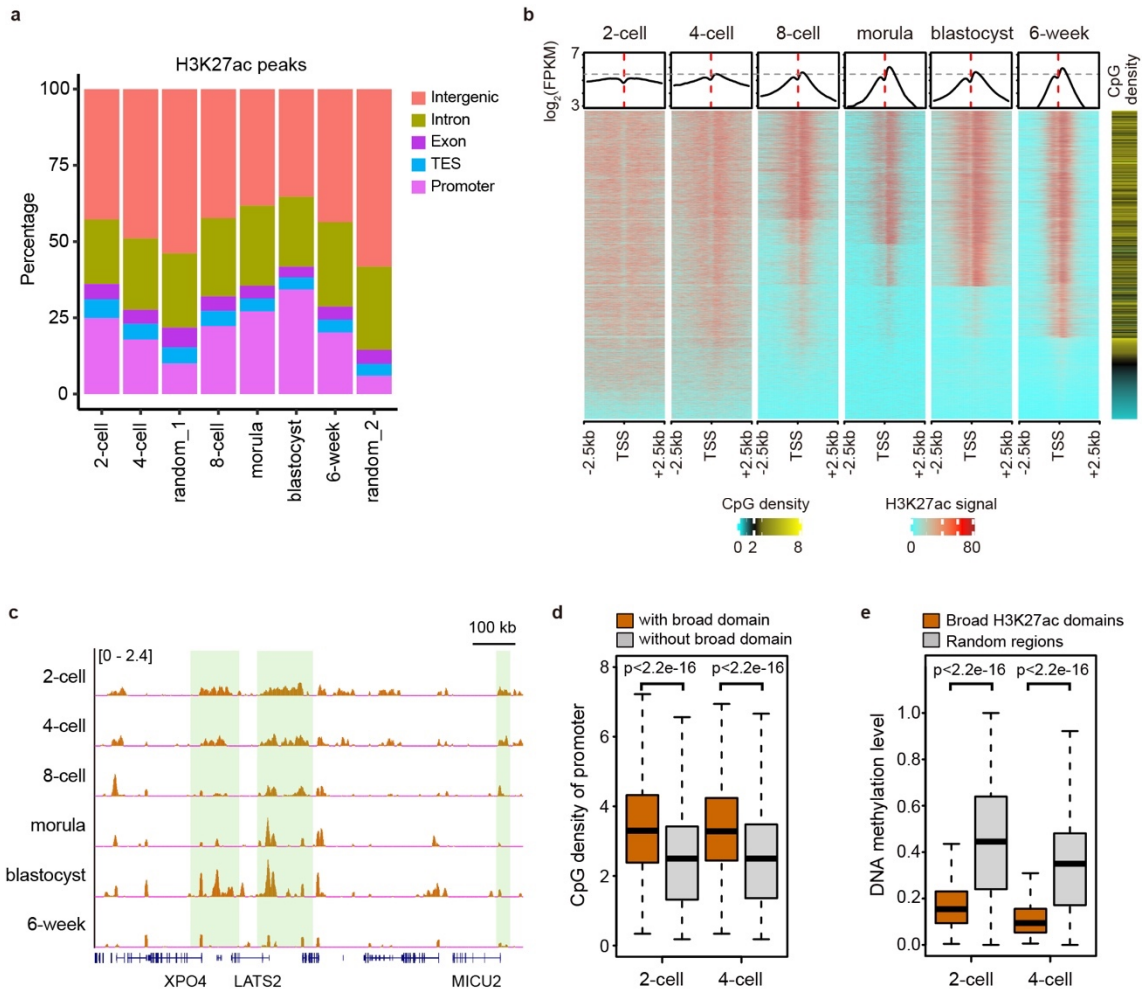

1

2 **Supplementary Fig. S3 Characteristics of broad H3K27ac domains in human**

3 **early embryos.** **a** Percentage of H3K27ac modifications in different types of

4 genomic elements at the indicated stages in human early embryos. Two sets of

5 genomic regions chosen randomly which match the H3K27ac peak number and

6 peak lengths in human 2-cell embryos (random\_1) and 6-week embryos

7 (random\_2), respectively, are utilized for comparison. **b** Heat maps showing

8 H3K27ac signal (FPKM values) at the promoters (TSS  $\pm$  2.5kb) of protein-coding

9 genes for human embryos at the indicated stages. The genes are sorted according

10 to the state of H3K27ac enrichment in promoters. The panels above the heat maps

11 plot the average H3K27ac signals ( $\log_2(\text{FPKM values} + 1)$ ) around TSS. The CpG

12 densities of promoters are shown in the right. **c** Genome browser view of H3K27ac

13 signal in the promoters of genes in human early embryos. Green shadows

14 represent the locations of broad H3K27ac domains. **d** Box plots showing CpG

15 densities of promoters with or without broad H3K27ac domains ( $>10\text{kb}$ ) in human

16 2-cell and 4-cell embryos, respectively. Wilcoxon rank sum test is used. Boxes and

17 whiskers represent the 25th/75th percentiles and  $1.5\times$  interquartile range,

18 respectively. **e** Box plots comparing the DNA methylation levels between broad

1 H3K27ac domains and the random genomic regions in human 2-cell and 4-cell  
2 embryos, respectively. Wilcoxon rank sum test is used. Boxes and whiskers  
3 represent the 25th/75th percentiles and 1.5× interquartile range, respectively.  
4

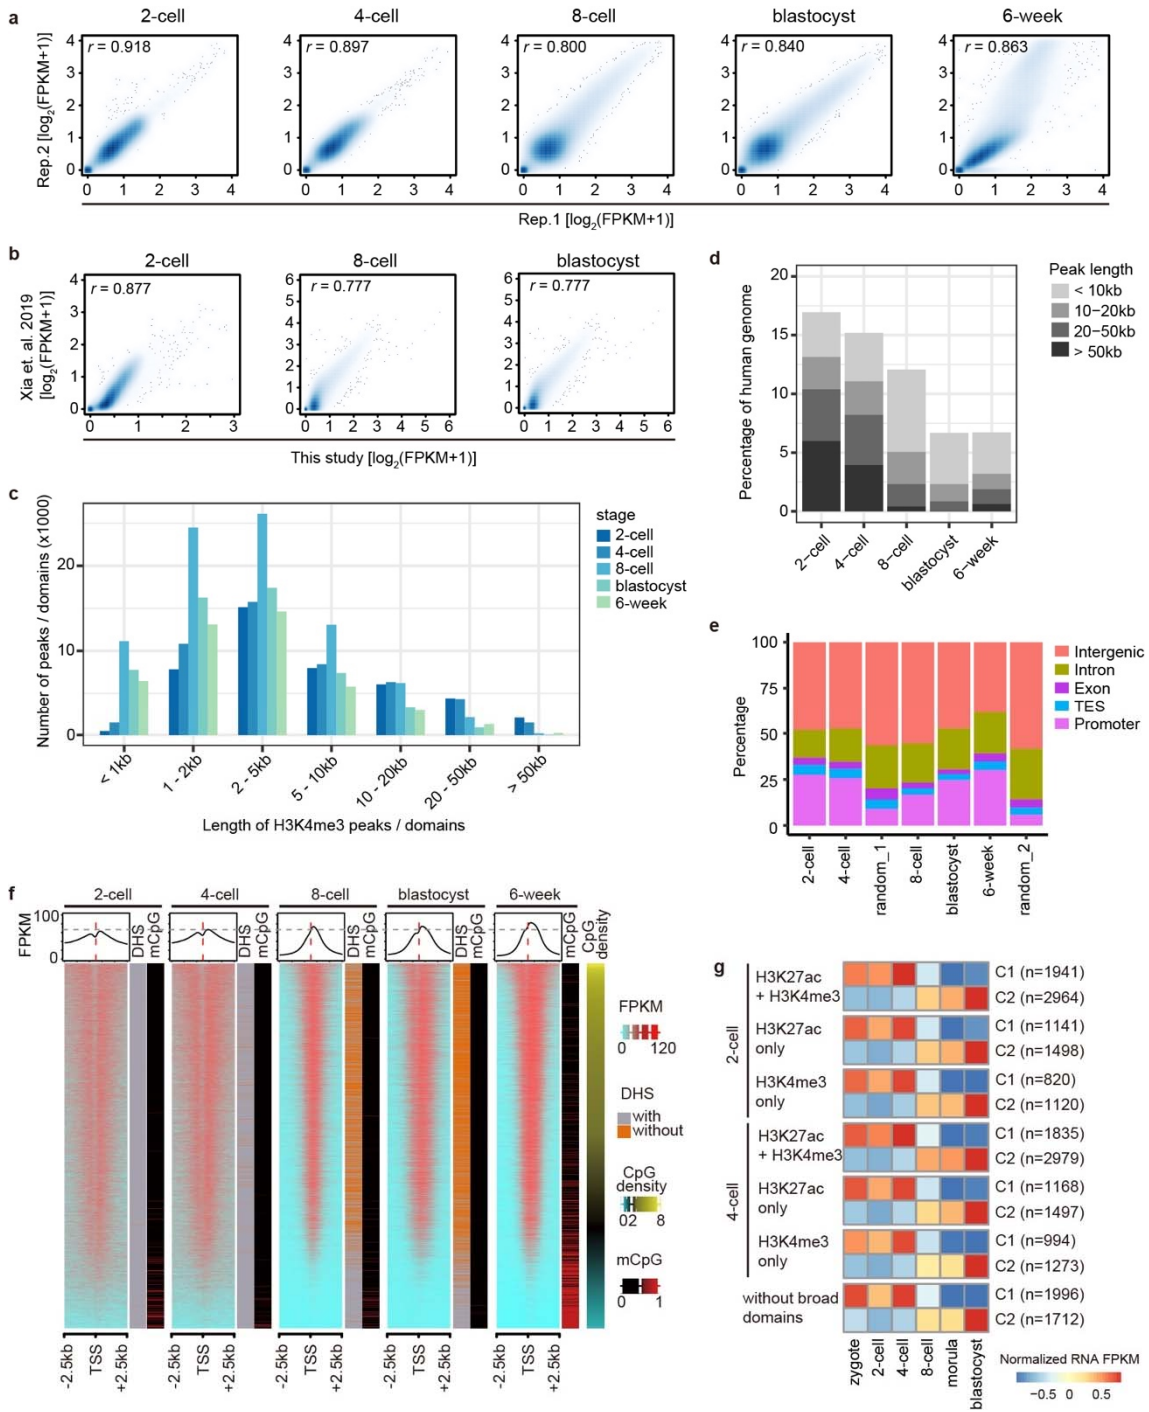

1

2 **Supplementary Fig. S4 Characteristics of broad H3K4me3 domains in human**  
 3 **embryos. a** Scatter plot showing the correlation of H3K4me3 signal between two  
 4 replicates for human early embryos. Pearson correlation coefficients ( $r$ ) are  
 5 indicated. **b** Scatter plot showing the correlation of H3K4me3 signal in human early  
 6 embryos between this study and previously reported data (Xia et al. *Science*.  
 7 2019). Pearson correlation coefficients ( $r$ ) are indicated. **c** Numbers of H3K4me3  
 8 peaks or domains within different ranges of lengths in human early embryos. **d**

1 Percentages of human genome covered by H3K4me3 peaks with different ranges  
2 of peak lengths in human early embryos. **e** Percentages of H3K4me3 peaks with  
3 different ranges of peak lengths at each stage in human early embryos. **f** Heat  
4 maps showing H3K4me3 ChIP-seq signal (FPKM values) at promoter regions  
5 (TSS  $\pm$  2.5kb) for human embryos. The chromatin accessibility states and the  
6 average DNA methylation levels of each promoter are indicated beside. Genes are  
7 sorted according to the CpG densities of promoters. The upper panels plot the  
8 average H3K4me3 ChIP-seq signals (FPKM values) at promoter regions. **g** Heat  
9 maps showing the RNA expression dynamics of genes, whose promoters are  
10 covered by broad H3K27ac or H3K4me3 domains (>10kb) at the 2-cell and 4-cell  
11 stages, during human early embryos. At each developmental stage, the genes are  
12 classified into several groups according to broad H3K27ac and H3K4me3 signals.  
13 In each group of genes, the genes are clustered into 2 clusters (C1 and C2) by k-  
14 means method. The number of genes in each cluster is shown. The genes whose  
15 promoters are not covered by broad H3K27ac or H3K4me3 domains at both 2-cell  
16 and 4-cell stages are used for comparison.  
17

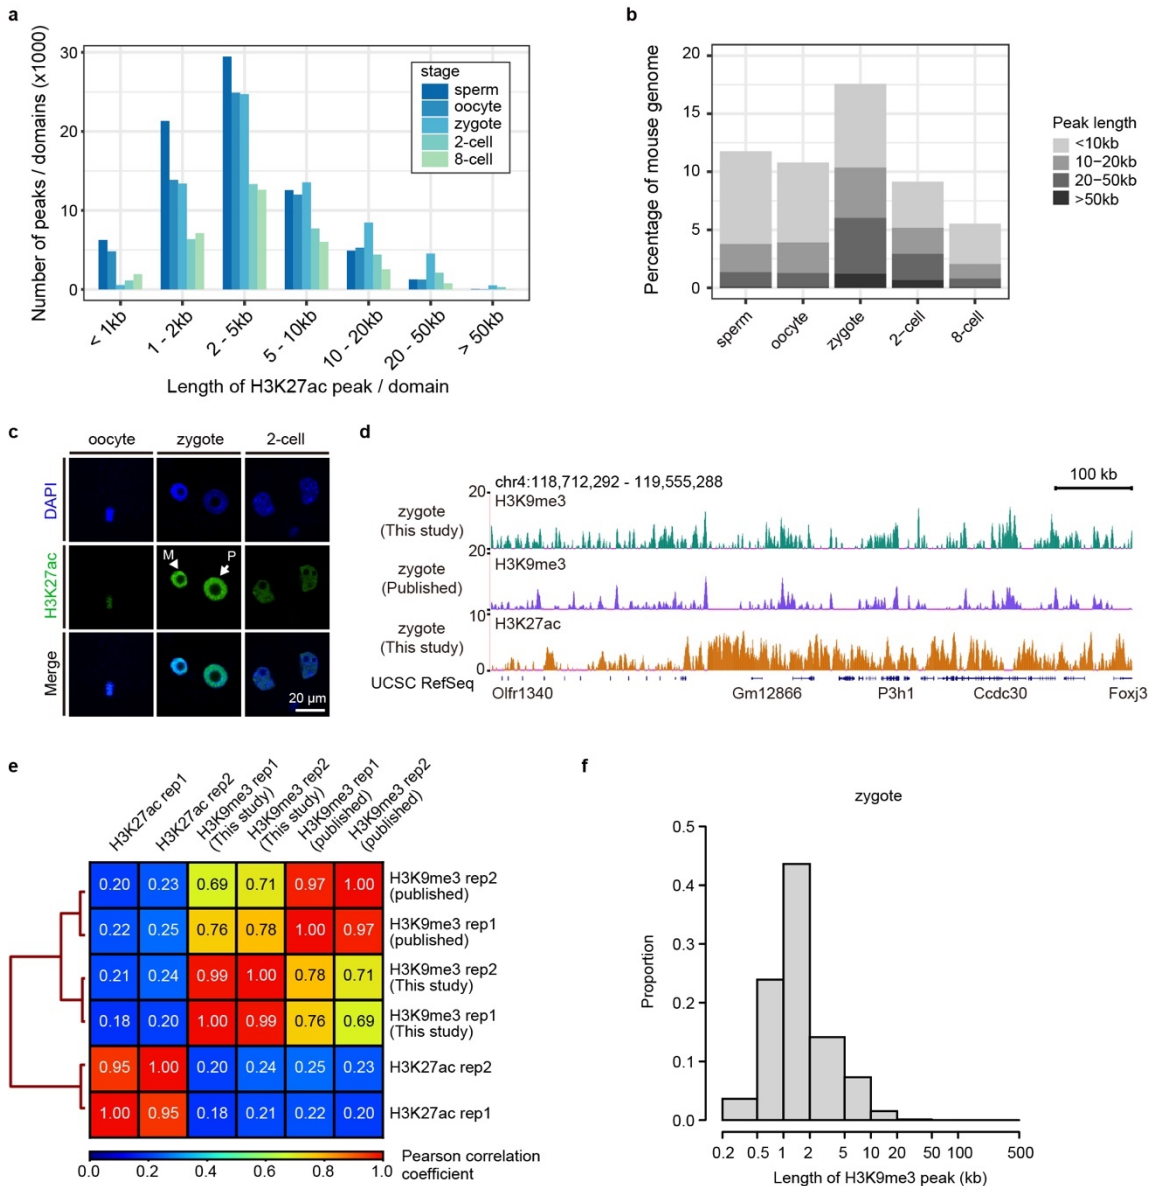

1  
2 **Supplementary Fig. S5 Broad H3K27ac domains are detected in mouse**  
3 **zygote.** **a** Numbers of H3K27ac peaks or domains within different ranges of  
4 lengths in mouse gametes and early embryos. **b** Percentages of human genome  
5 covered by H3K27ac peaks with different ranges of peak lengths in mouse  
6 gametes and early embryos. **c** Immunostaining of H3K27ac in mouse oocytes and  
7 early embryos. DNA is stained by DAPI (blue). H3K27ac signal is shown in green  
8 color. The representative images of 3 independent experiments are shown. Scale  
9 bar, 20  $\mu$ m. M, maternal pronucleus. P, paternal pronucleus. **d** Genome browser  
10 view of H3K9me3 and H3K27ac signals in mouse zygotes. The published  
11 H3K9me3 data of mouse zygotes are referred from Wang et al. *Nat Cell Biol.* 2018.  
12 **e** Hierarchical clustering of H3K9me3 and H3K27ac ChIP-seq data in mouse



- 1 zygotes according to the Pearson correlation coefficients. **f** Proportions of
- 2 H3K9me3 peaks with different ranges of peak lengths in mouse zygotes.
- 3

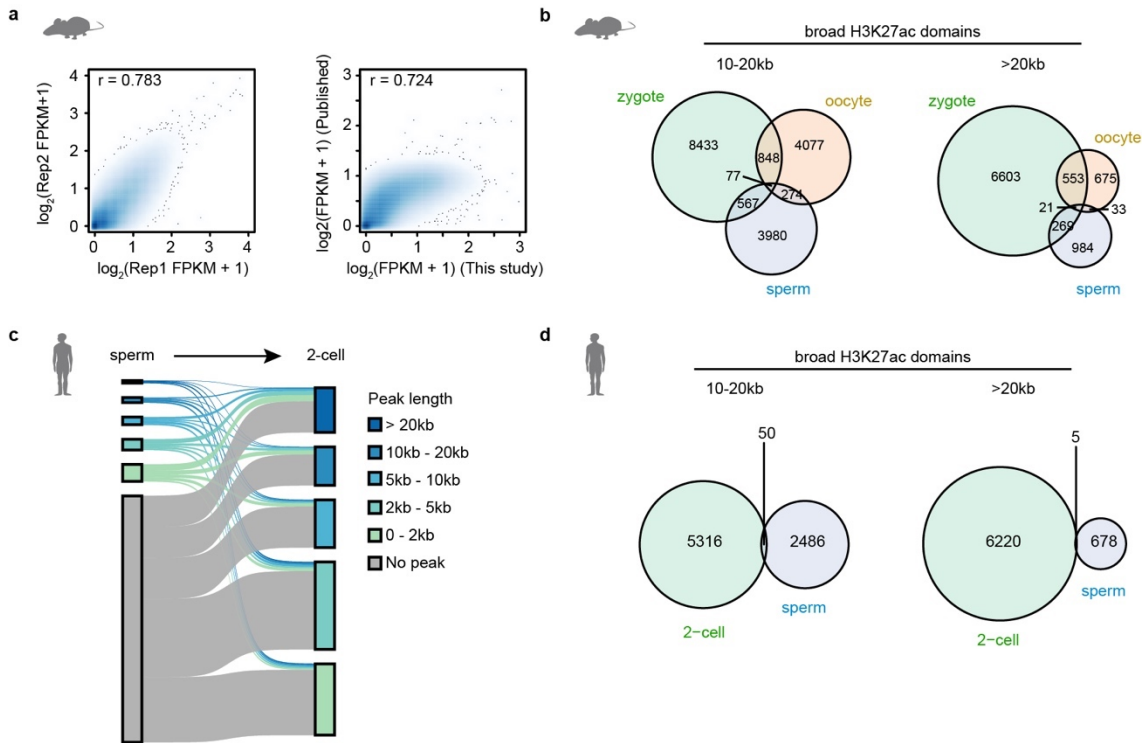

1  
2 **Supplementary Fig. S6 The inheritance of broad H3K27ac domains in human**  
3 **and mouse early embryos. a** Scatter plot showing the correlation of H3K27ac  
4 signal in mouse oocytes between this study and previously reported data (Xu et al.  
5 *Nat Genet.* 2019). Pearson correlation coefficients ( $r$ ) are indicated. **b** Venn  
6 diagrams showing the numbers of overlapping broad H3K27ac domains among  
7 zygote, oocyte and sperm in mouse. The broad H3K27ac domains are classified  
8 into two groups. The domain lengths of one group are 10-20kb, the domain lengths  
9 of the other group are > 20kb. **c** Sankey diagram showing the length dynamics of  
10 H3K27ac peaks between sperm and 2-cell embryo in human. The H3K27ac ChIP-  
11 seq data of human sperm are from Hammoud et al. *Cell Stem Cell.* 2014. **d** Venn  
12 diagrams showing the numbers of overlapping broad H3K27ac domains between  
13 2-cell embryo and sperm in human.

14

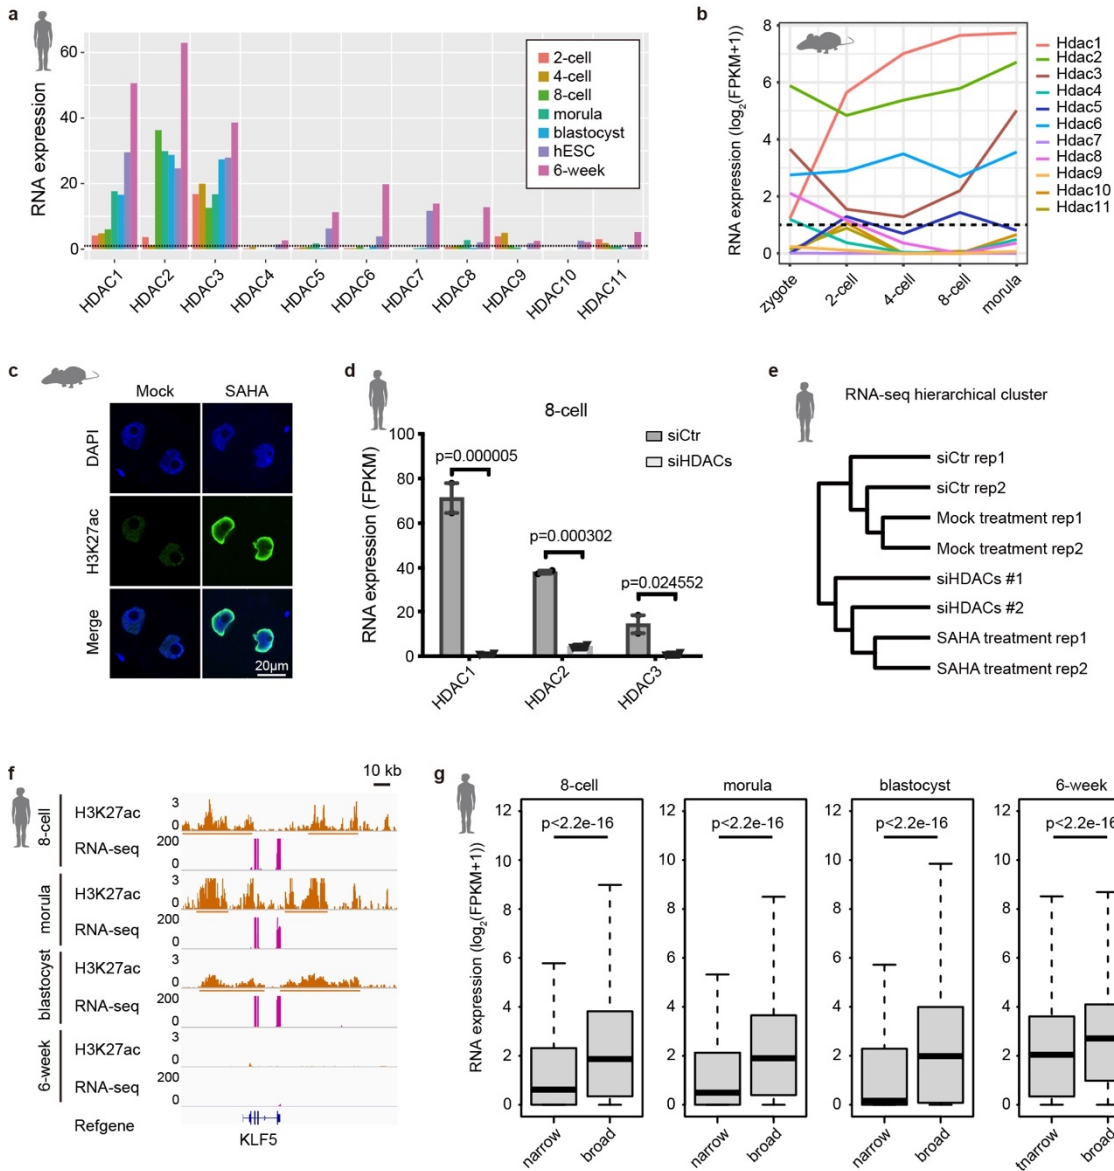

1  
2 **Supplementary Fig. S7 Removal of broad H3K27ac domains is associated**  
3 **with ZGA in human early embryos.** **a** RNA expression levels of classical HDACs  
4 in human early embryos. The black dashed line represents the FPKM value of 1.  
5 **b** RNA expression levels of classical Hdacs in mouse early embryos. The black  
6 dashed line represents the FPKM value of 1. **c** Immunostaining images of  
7 H3K27ac signal in mouse 2-cell embryos with mock or SAHA treatment. **d** RNA  
8 expression levels of HDAC1, HDAC2 and HDAC3 for either control siRNA or  
9 HDACs siRNA injected human 8-cell embryos. siCtr represents control siRNA  
10 injected embryo (n=2). siHDACs represent HDAC1, HDAC2 and HDAC3 triple  
11 knockdown human embryos (n=2). Two different sets of triple siRNA mixtures were  
12 utilized to collect the two biological replicates of HDACs KD embryos. T-test was  
13 used. Error bars represent standard errors. **e** Hierarchical clustering results  
14 showing the relationships of RNA expression profiles among HDACs knockdown

1 embryos and SAHA treated human embryos based on RNA-seq results. SAHA is  
2 an inhibitor of class I HDACs, including HDAC1, HDAC2 and HDAC3. **f** Genome  
3 browser view of broad H3K27ac domains and RNA expression pattern of the  
4 associated gene in human embryo after ZGA. The locations of broad H3K27ac  
5 domains are shown below H3K27ac signal tracks. **g** Boxplots comparing RNA  
6 expression levels of narrow H3K27ac peaks (<10kb) associated genes and those  
7 of broad H3K27ac domains (>10kb) associated genes in human early embryos.  
8 Wilcoxon test is used. Boxes and whiskers represent the 25th/75th percentiles and  
9 1.5× interquartile range, respectively.  
10

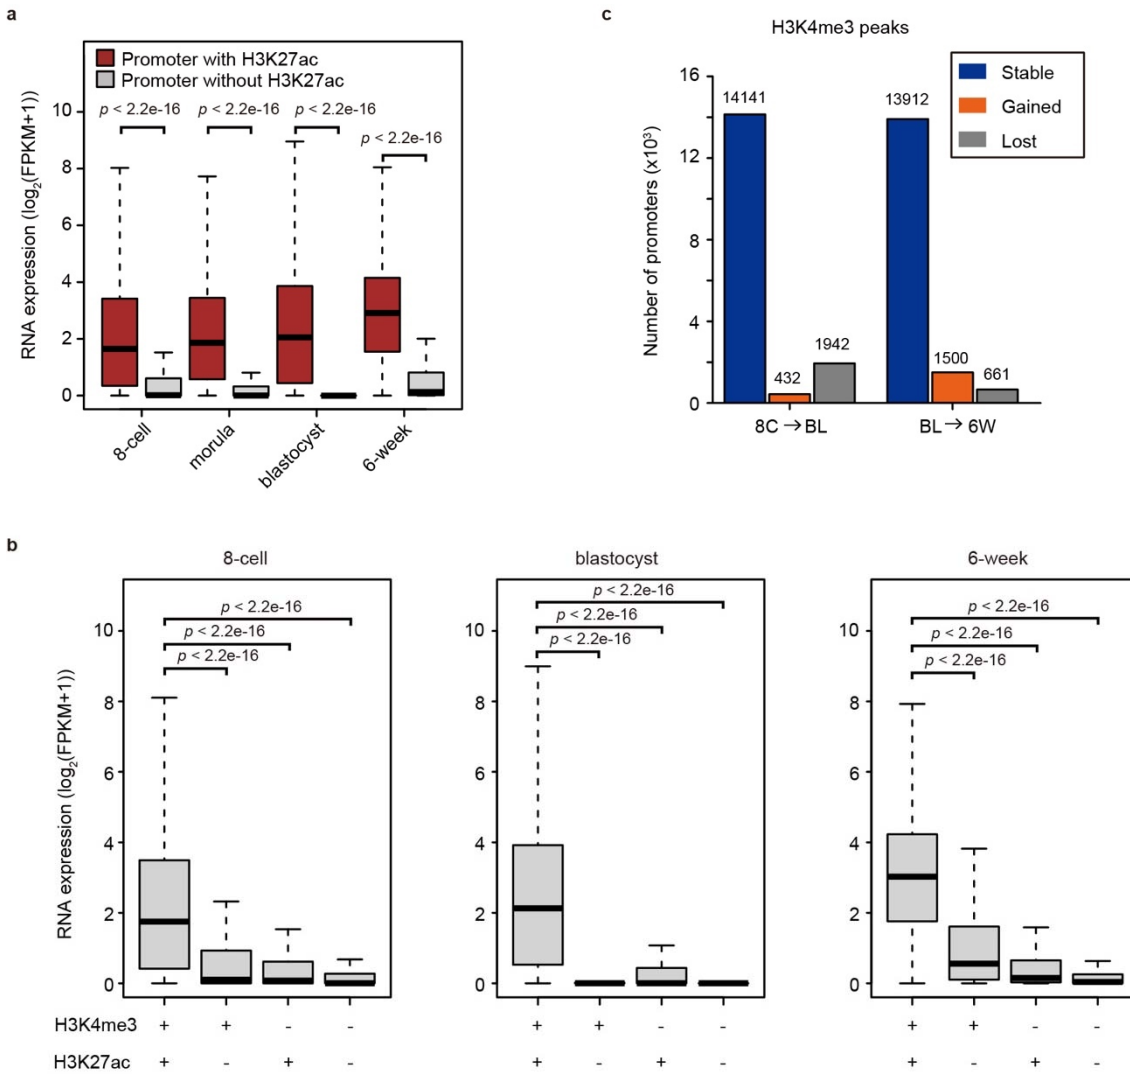

1  
2 **Supplementary Fig. S8 Promoter H3K27ac in human embryos.** **a** Box plots of  
3 RNA expression levels between genes with and without H3K27ac enrichment in  
4 promoters at 8-cell, morula, blastocyst and 6-week stages. Wilcoxon test was  
5 used. Boxes and whiskers represent the 25th/75th percentiles and 1.5 $\times$   
6 interquartile range, respectively. **b** Box plots of RNA expression levels of genes  
7 with both H3K27ac and H3K4me3 enrichment at the promoters, with only H3K27ac  
8 enrichment, with only H3K4me3 enrichment, and with neither enrichment at  
9 different stages. Wilcoxon test was used. Boxes and whiskers represent the  
10 25th/75th percentiles and 1.5 $\times$  interquartile range, respectively. **c** Plot showing the  
11 dynamics of promoters with H3K4me3 enrichment between two stages. Promoter  
12 number is indicated above each bar. 8C, 8-cell; BL, blastocyst; 6W, 6-week.

13

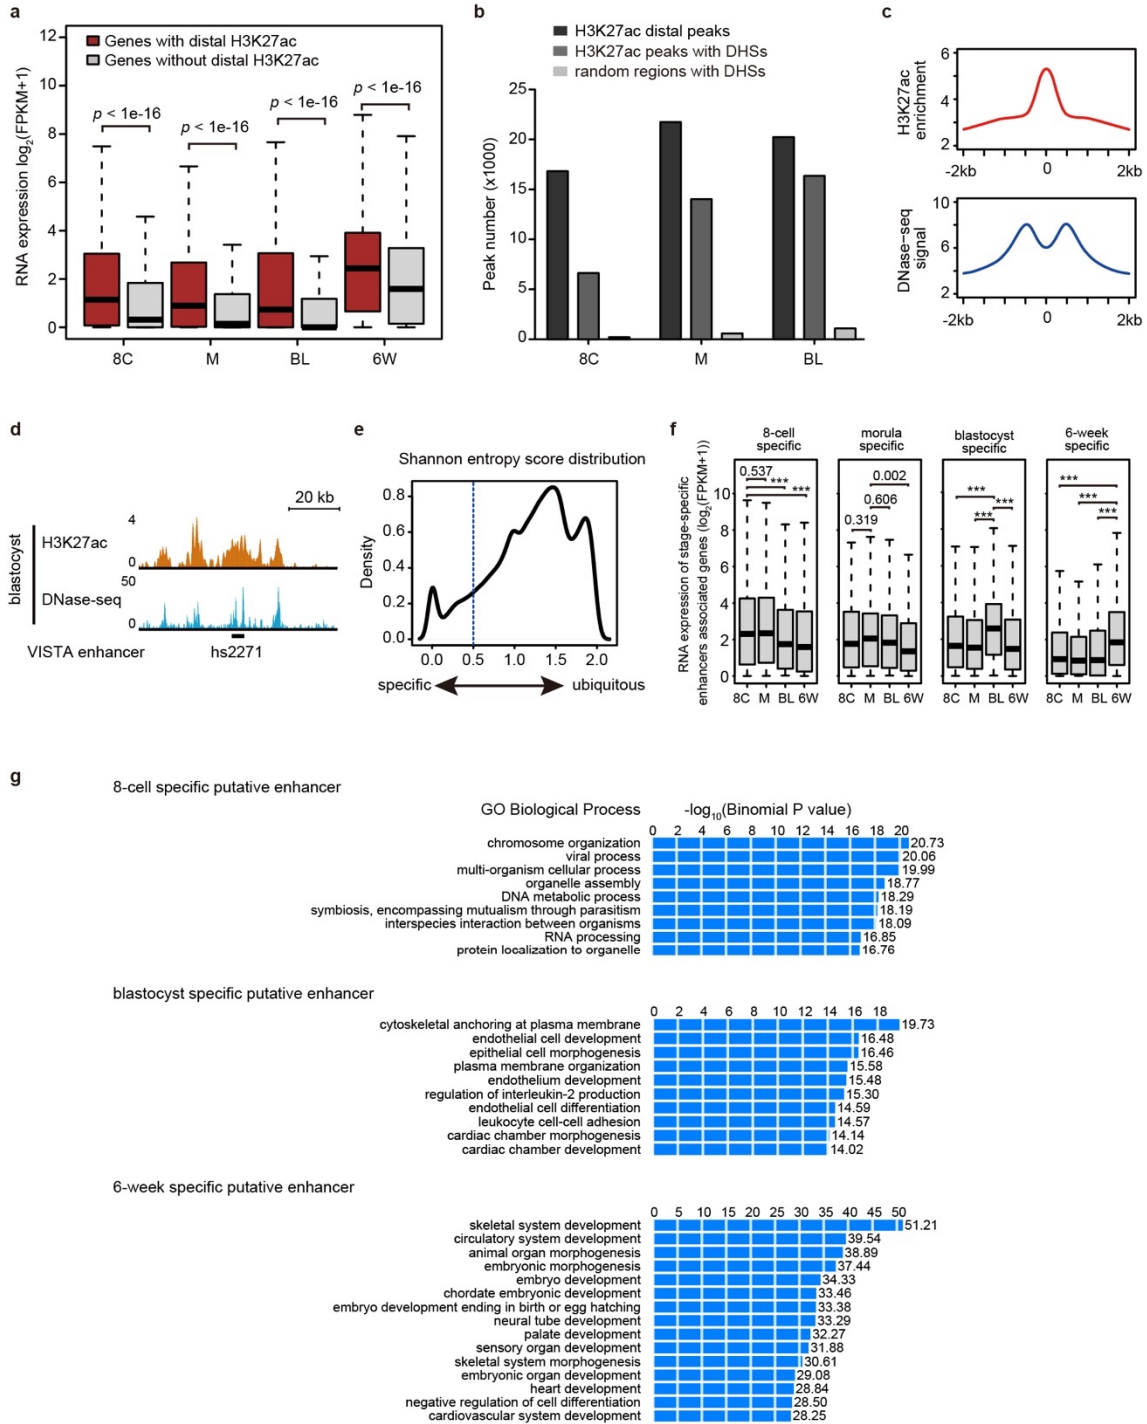

1  
2 **Supplementary Fig. S9 Putative enhancers in human early embryos.** a Box  
3 plots of RNA expression level between genes with and without H3K27ac peaks  
4 around TSS ( $\pm 300\text{kb}$ ) at the indicated human stages. RNA expression level  
5 represents the value of  $\log_2(\text{FPKM} + 1)$ . Wilcoxon test was used. Boxes and  
6 whiskers represent the 25th/75th percentiles and  $1.5\times$  interquartile range,  
7 respectively. b Bar plots indicating the number of distal H3K27ac peaks, H3K27ac  
8 peaks with DHSs, and random regions with DHSs from 8-cell stage to blastocyst

1 stage. If a DHS is located within a H3K27ac peak center  $\pm$  500 bp region, this  
2 H3K27ac peak is referred as a H3K27ac peak with DHSs. **c** Profiles showing the  
3 average H3K27ac enrichment and DNase-seq signal (FPKM values) around the  
4 center of H3K27ac peaks in human blastocysts. **d** Genome browser snapshot of  
5 H3K27ac modifications around VISTA enhancer hs2271 in human. The locations  
6 of enhancer element hs809 is indicated by blue box. **e** Histogram shows the  
7 distribution of the Shannon entropy score of H3K27ac enrichment levels for  
8 putative active enhancers (with both H3K27ac enrichment and DHSs) in human 8-  
9 cell, morula, blastocyst, and 6-week embryos. The H3K27ac peaks with lower  
10 Shannon entropy score are more stage-specific. The H3K27ac peaks with  
11 Shannon entropy score lower than 0.5 (dashed line) were defined as stage-specific  
12 putative enhancers. **f** Boxplots comparing RNA expression of stage-specific  
13 enhancer associated genes in morula, blastocyst and 6-week embryos. Wilcoxon  
14 test was used. \*\*\* represents  $p < 0.001$ . Boxes and whiskers represent the  
15 25th/75th percentiles and 1.5 $\times$  interquartile range, respectively. **g** Gene ontology  
16 (GO) analysis of genes associated with stage-specific putative enhancers.  
17

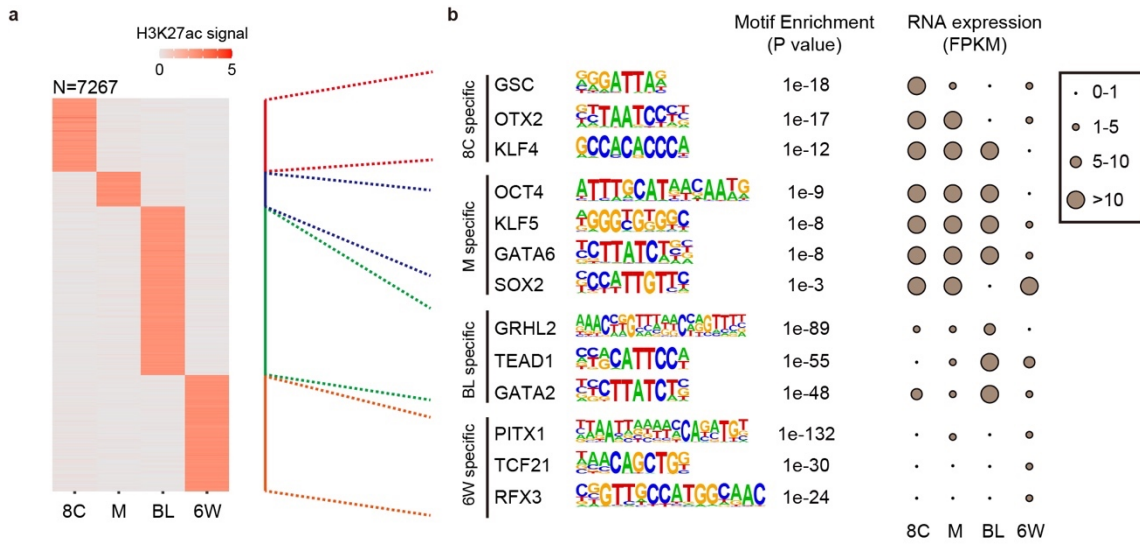

1  
2  
3  
4  
5  
6  
7  
8  
9

**Supplementary Fig. S10 Transcription factor binding motifs enriched in stage specific putative enhancers.** **a** Heat map showing H3K27ac ChIP-seq signal of stage-specific putative enhancers (n=7267) in human embryos. The ChIP-seq signal represents FPKM value of each enhancer. **b** Transcription factor binding motif enrichment analysis of the stage-specific putative enhancers. The binding motifs, enrichment P values, and RNA expression levels of the top enriched transcription factors at each stage are shown.



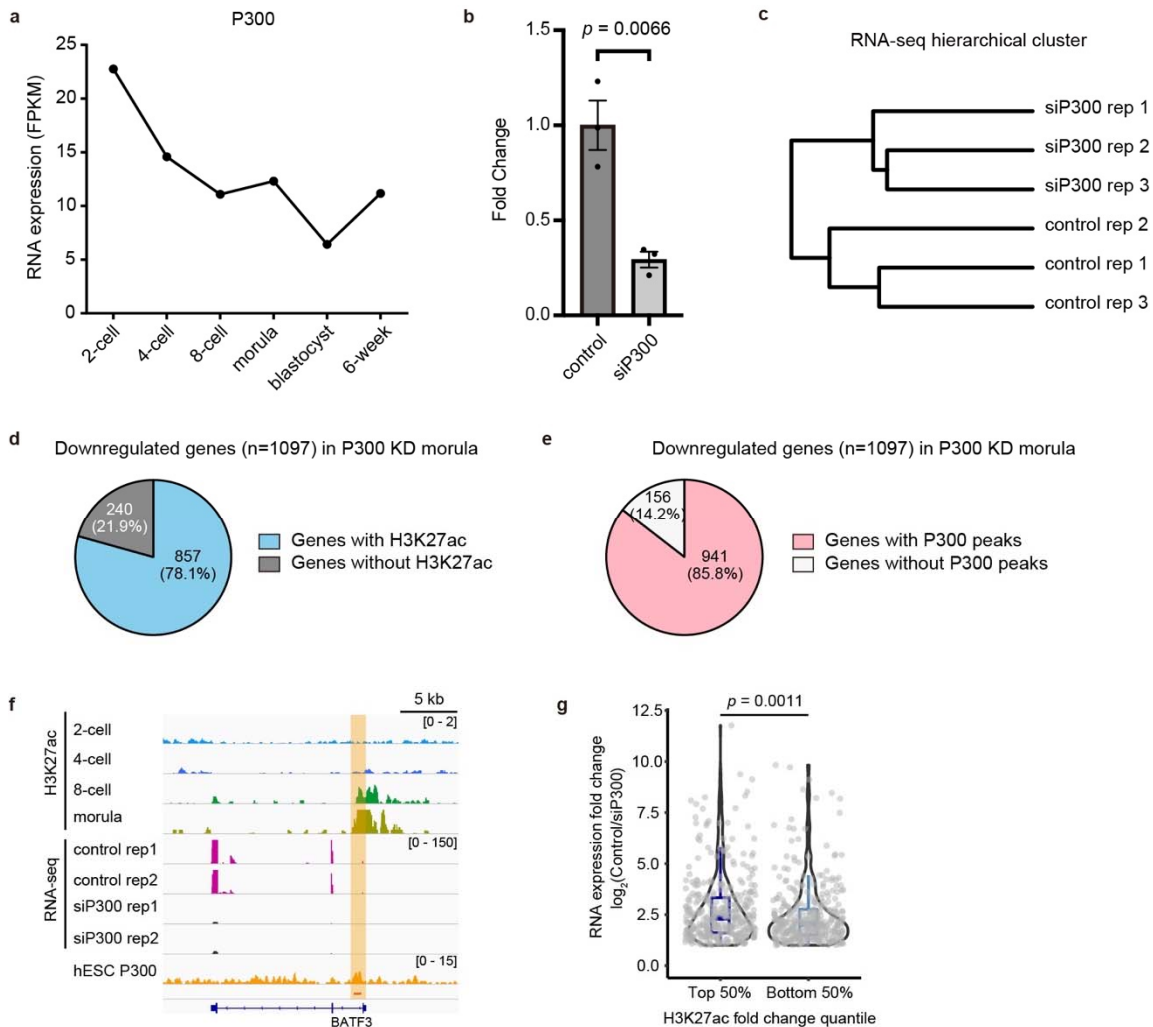

1

2 **Supplementary Fig. S11 Disruption of H3K27ac in human early embryos. a**

3 RNA expression levels of P300 in human early embryos. **b** Fold change of P300

4 RNA expression in P300 siRNA injected human morulae comparing to control

5 siRNA injected embryos. siCtr represents control siRNA injected embryo. Three

6 control siRNA injected embryos, one P300 siRNA #1 injected embryo and two

7 P300 siRNA#2 injected embryos were analyzed. T-test was used. Error bars

8 represent standard error of mean. **c** Hierarchical clustering results showing the

9 relationships of RNA expression profiles among control siRNA or P300 siRNA

10 knockdown embryos and SAHA treated human embryos based on RNA-seq

11 results. **d** Pie chart showing the numbers and percentages of genes with H3K27ac

12 modification nearby in the downregulated genes in human P300 KD morula. **e** Pie

13 chart indicating the numbers and percentages of genes with P300 peaks nearby

14 in the downregulated genes in human P300 KD morula. The data of P300 peaks

15 are from hESC. **f** Genome browser view showing H3K27ac enrichment, RNA

16 expression pattern and P300 enrichment around gene that is downregulated in

17 P300 KD morula. P300 peak region is shown under P300 signal track. The location

1 of P300 peak is labeled in shadow. **g** Violin and box plots comparing the  
2 expression fold change of H3K27ac peak associated genes (within 50kb around  
3 H3K27ac peaks) upon P300 KD between downregulated H3K27ac peaks with top  
4 50% of fold changes upon P300 KD and the other downregulated H3K27ac peaks.  
5 Wilcoxon test was used. Boxes and whiskers represent the 25th/75th percentiles  
6 and 1.5× interquartile range, respectively.  
7

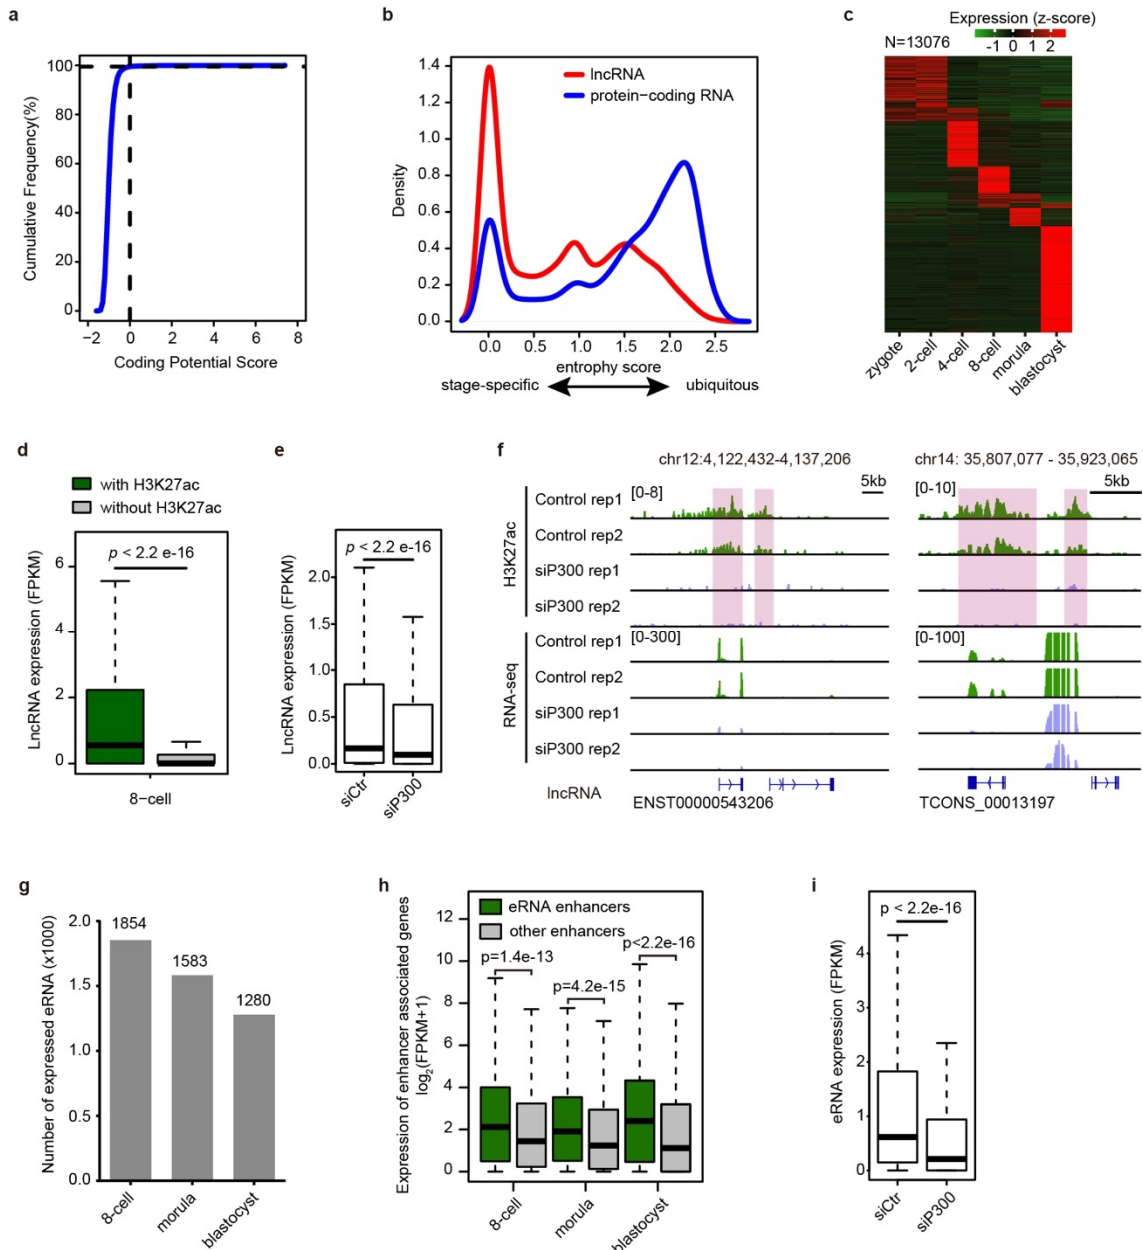

1  
2 **Supplementary Fig. S12 Non-coding RNAs are downregulated upon P300 KD**  
3 **in human morula.** **a** Cumulative frequency of the coding potential score of  
4 predicted lncRNAs. lncRNAs with coding potential score < 0 means that these  
5 lncRNAs cannot encode proteins. **b** Histogram showing the distribution of the  
6 Shannon entropy scores of the expressions of protein-coding RNAs and lncRNAs  
7 in human early embryos. The RNAs with lower Shannon entropy score are more  
8 stage-specific. **c** Heat map showing the expression levels of the predicted lncRNAs  
9 in human early embryos. **d** Boxplots comparing lncRNA expression levels between  
10 those with and without H3K27ac in human 8-cell embryos. Wilcoxon test was used.  
11 Boxes and whiskers represent the 25th/75th percentiles and 1.5× interquartile  
12 range, respectively. **e** Boxplots comparing lncRNA expression levels between  
13 P300 KD morula and control morula. Wilcoxon test was used. Boxes and whiskers

1 represent the 25th/75th percentiles and 1.5× interquartile range, respectively. **f**  
2 Genome browser view of H3K27ac signal and RNA expression of lncRNAs in  
3 control and P300 KD morulae. The lncRNA in the right panel is a predicted lncRNA  
4 which is identified in this study. **g** Graphic indicates the numbers of expressed  
5 eRNAs in human early embryos. The expressed eRNAs are those with FPKM >  
6 0.5. **h** Boxplots comparing the expression levels between the genes with eRNA  
7 enhancers and those with non-eRNA enhancers. Wilcoxon rank sum test is used.  
8 Boxes and whiskers represent the 25th/75th percentiles and 1.5× interquartile  
9 range, respectively. **i** Boxplots showing eRNA expression levels in P300 KD  
10 morula. Wilcoxon rank sum test is used. Boxes and whiskers represent the  
11 25th/75th percentiles and 1.5× interquartile range, respectively.  
12

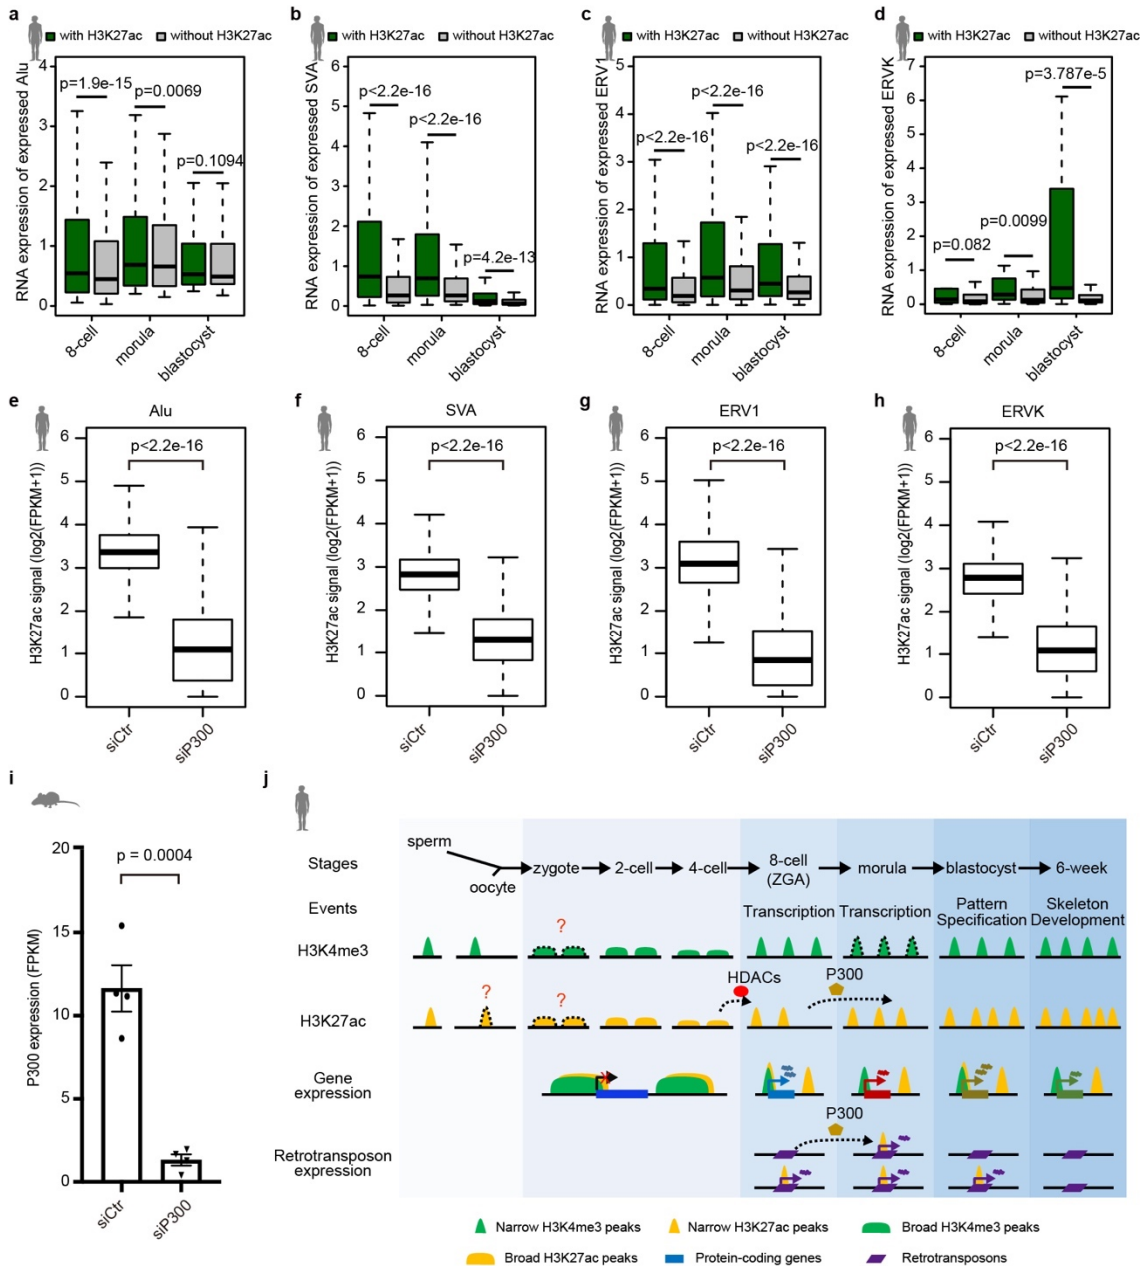

1  
2 **Supplementary Fig. S13 H3K27ac is essential for transposon activation in**  
3 **early embryos. a-d** Boxplots comparing RNA expression of retrotransposons  
4 between those with H3K27ac and without H3K27ac modifications in human  
5 embryos at 8-cell, morula and blastocyst stages. The expressed retrotransposons  
6 (FPKM > 0) were analyzed for comparison. Wilcoxon rank sum test is used. Boxes  
7 and whiskers represent the 25th/75th percentiles and 1.5× interquartile range,  
8 respectively. **e-h** Boxplots showing H3K27ac signals of retrotransposons in control  
9 and P300 KD human morulae. Wilcoxon rank sum test is used. Boxes and  
10 whiskers represent the 25th/75th percentiles and 1.5× interquartile range,  
11 respectively. **i** Bar plot showing P300 expression levels in control or P300 KD  
12 mouse 8-cell embryos. Four biological replicates were performed for each group.

1 To collect P300 KD mouse embryos, two different siRNAs were used. Two  
2 biological replicates were collected for each P300 siRNA KD assay. T-test was  
3 used. Error bars represent standard error of mean. j A schematic model showing  
4 the dynamics of histone modifications during human early embryo development,  
5 and their functions in the expression regulation for gene and retrotransposon. The  
6 question marks mean that the patterns of histone modifications are not confirmed  
7 by CHIP-seq data.  
8

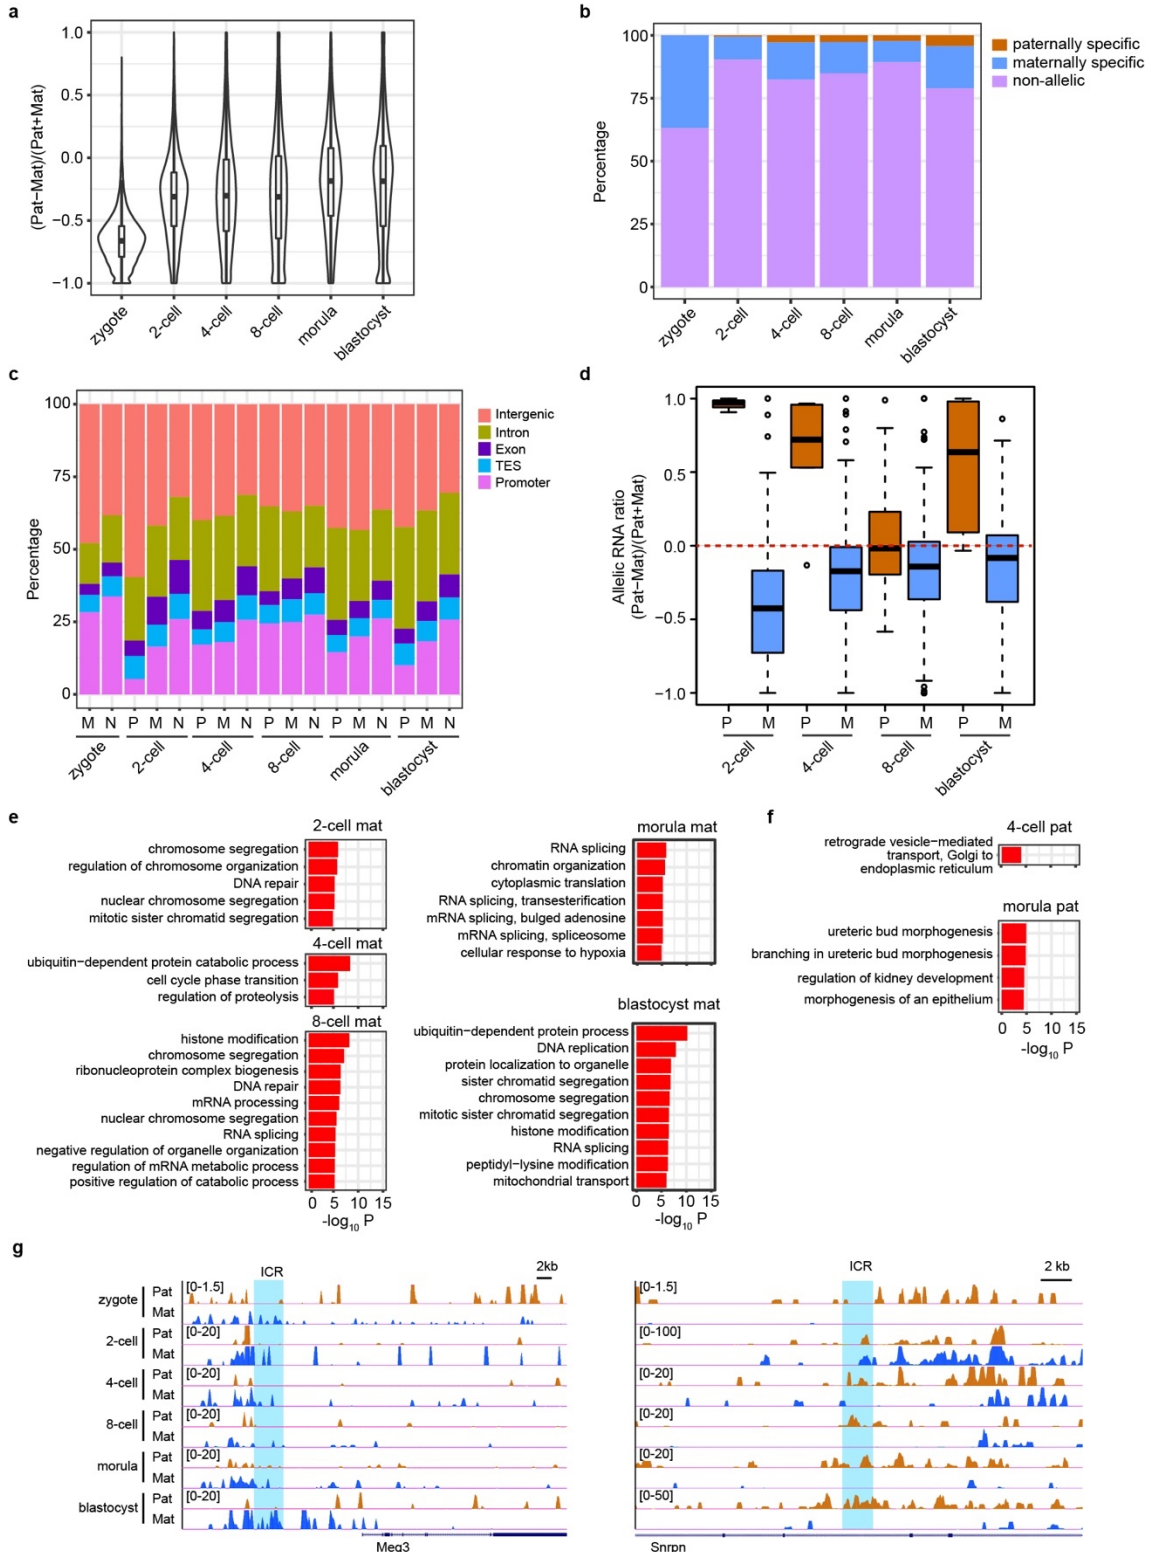

1  
2 **Supplementary Fig. S14 Allelic H3K27ac in mouse early embryos.** **a** Box plot  
3 showing the allelic bias of H3K27ac peaks in mouse early embryos. The allelic bias  
4 of a H3K27ac peak is calculated by the number difference between parental reads  
5 divided by the total number of parental reads in the H3K27ac peak. **b** Percentages

1 of allelic H3K27ac peaks at each developmental stage in mouse early embryos. **c**  
2 Genomic distribution of allelic H3K27ac peaks in mouse early embryos. P  
3 represents paternally specific peaks, M represents maternally specific peaks, N  
4 represents non-allelic peaks. **d** Box plot showing the allelic expression bias of  
5 genes whose promoters harbor allelic H3K27ac signal in mouse early embryos.  
6 The allelic expression bias of a gene is calculated by the number difference  
7 between parental reads divided by the total number of parental reads. P represents  
8 genes with paternally specific H3K27ac signal in promoters. M represents genes  
9 with maternally specific H3K27ac signal in promoters. **e** GO enrichment of genes  
10 whose promoters harbor maternal allele-specific H3K27ac in mouse early embryos.  
11 **f** GO enrichment of genes whose promoters harbor paternal allele-specific  
12 H3K27ac in mouse early embryos. **g** Genome browser view of allelic H3K27ac  
13 signal at ICRs of imprinted genes. Meg3 is a maternally expressed imprinted gene.  
14 Snrpn is a paternally expressed imprinted gene. The ICRs are highlighted in light  
15 blue shadows.  
16



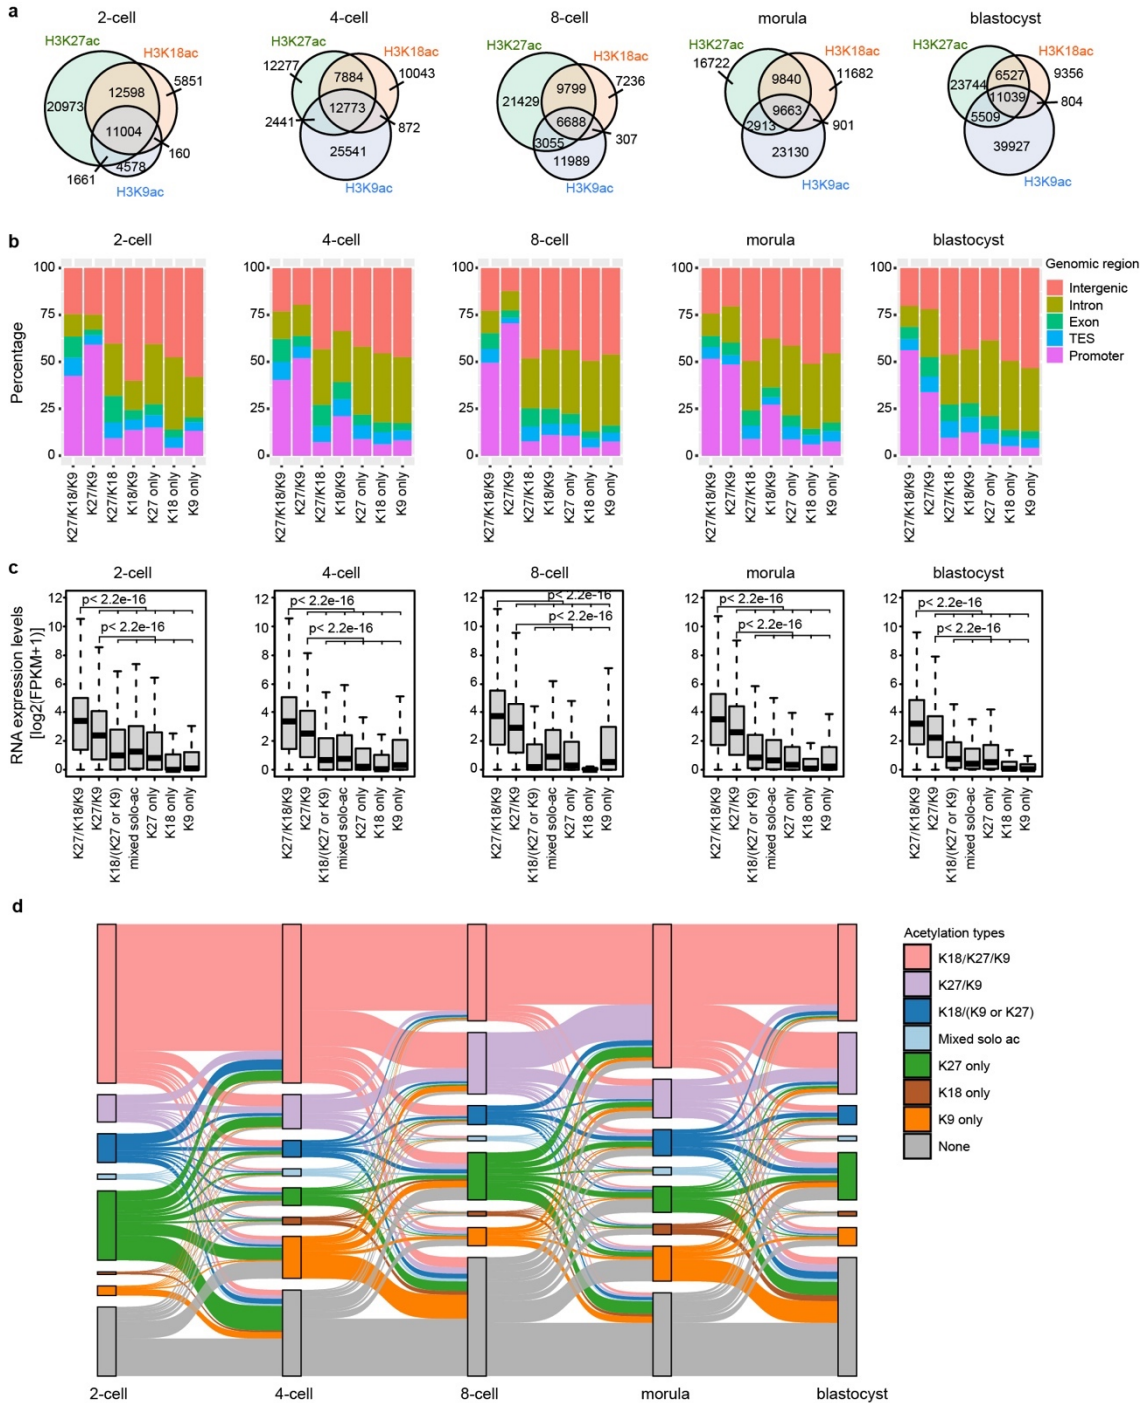

1  
2 **Supplementary Fig. S15 Characteristics of H3K27ac, H3K18ac and H3K9ac**  
3 **marked promoters in mouse early embryos.** **a** Venn diagrams showing  
4 overlapping peaks among H3K27ac, H3K18ac and H3K9ac peaks at each  
5 developmental stage in mouse early embryos. **b** Genomic distribution of peaks  
6 with different types of histone acetylations in mouse early embryos. K27/K18/K9  
7 represents peaks with H3K27ac, H3K18ac and H3K9ac. K27/K9 represents peaks  
8 with both H3K27ac and H3K9ac, but without H3K18ac. “K27 only” means the  
9 peaks with only H3K27ac. **c** Box plots comparing the RNA expression levels of

1 genes whose promoters harbor different types of histone acetylations. K18/(K27  
2 or K9) represents the promoters with K18/K27 or K18/K9. Wilcoxon rank sum test  
3 is used. Boxes and whiskers represent the 25th/75th percentiles and 1.5×  
4 interquartile range, respectively. **d** Sankey diagrams showing the dynamics of  
5 histone acetylations in the promoters during mouse embryo development. “Mixed  
6 solo ac” represents that a promoter harbors several peaks with different types of  
7 solo acetylation.  
8

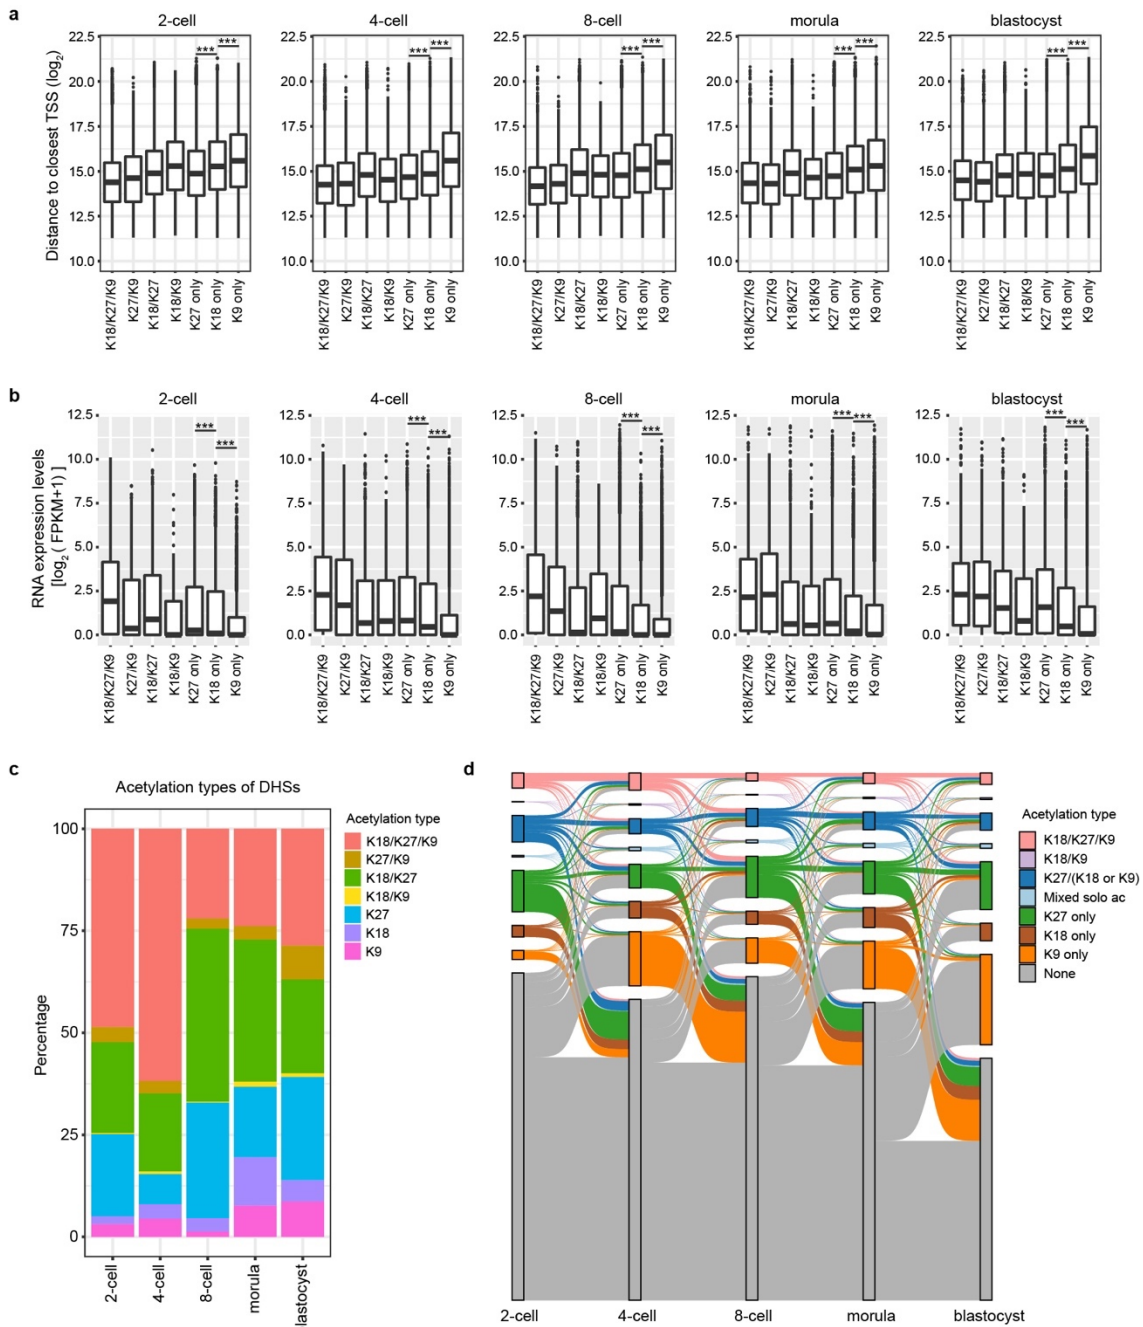

1  
2 **Supplementary Fig. S16 Characteristics of H3K27ac, H3K18ac and H3K9ac**  
3 **marked distal regions in mouse early embryos. a** Box plots showing the  
4 distances of distal peaks with different types of histone acetylations to the closest  
5 TSS. Wilcoxon rank sum test is used. \*\*\* represents  $p < 0.001$ . Boxes and whiskers  
6 represent the 25th/75th percentiles and  $1.5 \times$  interquartile range, respectively. **b**  
7 Box plots showing the RNA expression levels of genes with different types of  
8 histone acetylation at the closest distal peaks. Wilcoxon rank sum test is used. \*\*\*  
9 represents  $p < 0.001$ . **c** Percentages of DHSs with different types of histone  
10 acetylations in mouse early embryos. **d** Sankey diagram showing the dynamics of  
11 histone acetylations at distal peaks in mouse early embryos.

| Stage          | Embryo Num. | Antibody     | Raw reads   | Mapping rate | Unique reads |
|----------------|-------------|--------------|-------------|--------------|--------------|
| 2-cell         | 21          | H3K4me3 rep1 | 68,889,720  | 97.20%       | 23,101,608   |
|                | 20          | H3K4me3 rep2 | 72,214,363  | 97.03%       | 15,399,077   |
|                | 22          | H3K27ac rep1 | 64,466,642  | 97.68%       | 23,842,208   |
|                | 20          | H3K27ac rep2 | 79,697,644  | 97.67%       | 34,103,644   |
|                |             | Input rep1   | 74,812,397  | 96.63%       | 9,557,917    |
|                |             | Input rep2   | 77,947,702  | 96.83%       | 10,271,396   |
| 4-cell         | 13          | H3K4me3 rep1 | 101,258,508 | 97.30%       | 14,140,608   |
|                | 10          | H3K4me3 rep2 | 88,322,922  | 97.24%       | 25,068,603   |
|                | 12          | H3K27ac rep1 | 71,051,962  | 97.31%       | 19,734,741   |
|                | 10          | H3K27ac rep2 | 76,300,861  | 97.47%       | 28,628,922   |
|                |             | Input rep1   | 77,584,929  | 95.63%       | 6,867,669    |
|                |             | Input rep2   | 90,593,288  | 96.31%       | 13,844,308   |
| 8-cell         | 7           | H3K4me3 rep1 | 172,060,918 | 96.40%       | 7,494,333    |
|                | 7           | H3K4me3 rep2 | 162,169,445 | 96.88%       | 9,228,314    |
|                | 7           | H3K27ac rep1 | 81,210,168  | 95.66%       | 4,347,801    |
|                | 7           | H3K27ac rep2 | 81,501,849  | 96.59%       | 5,026,328    |
|                |             | Input rep1   | 166,012,169 | 97.30%       | 47,263,206   |
|                |             | Input rep2   | 63,877,283  | 96.36%       | 18,370,464   |
| morula         | 4           | H3K27ac rep1 | 51,217,000  | 89.64%       | 1,909,040    |
|                | 4           | H3K27ac rep2 | 64,044,795  | 92.05%       | 2,310,634    |
|                | 4           | H3K27ac rep3 | 34,923,444  | 94.69%       | 2,608,773    |
|                |             | Input rep1   | 48,839,000  | 96.18%       | 6,788,988    |
| P300 KD morula | 4           | H3K27ac rep1 | 74,887,428  | 94.21%       | 2,263,733    |
|                | 4           | H3K27ac rep2 | 80,842,333  | 93.64%       | 3,735,113    |
|                |             | Input rep1   | 79,588,996  | 95.23%       | 7,540,944    |
| Blastocyst     | 1           | H3K4me3 rep1 | 77,929,220  | 96.46%       | 8,234,869    |
|                | 1           | H3K4me3 rep2 | 91,743,490  | 96.17%       | 8,927,474    |
|                | 2           | H3K27ac rep1 | 27,367,307  | 98.40%       | 11,261,361   |
|                | 2           | H3K27ac rep2 | 34,005,546  | 98.16%       | 17,170,732   |
|                |             | Input rep1   | 95,392,882  | 96.52%       | 17,379,662   |
|                |             | Input rep2   | 87,005,709  | 96.52%       | 10,808,524   |
| 6-week         | 2           | H3K4me3 rep1 | 47,200,887  | 91.96%       | 34,257,298   |
|                |             | H3K4me3 rep2 | 42,829,428  | 92.48%       | 31,603,022   |
|                |             | H3K27ac rep1 | 46,527,636  | 96.71%       | 37,948,726   |
|                |             | H3K27ac rep2 | 44,164,322  | 98.23%       | 37,580,732   |
|                |             | Input rep1   | 34,957,041  | 94.79%       | 26,595,006   |
|                |             | Input rep2   | 50,137,777  | 94.64%       | 39,241,279   |

1 **Supplementary Table S1 Sequencing and mapping information of human**  
2 **ChIP-seq data.**

3

| Species            | Stage  | Condition           | Raw reads  | Mapping rate | Mapping reads |
|--------------------|--------|---------------------|------------|--------------|---------------|
| Human              | 8-cell | Mock treatment rep1 | 66,205,044 | 96.27%       | 61,071,281    |
|                    |        | Mock treatment rep2 | 46,753,272 | 94.98%       | 42,699,377    |
|                    |        | SAHA treatment rep1 | 46,287,284 | 95.12%       | 42,729,441    |
|                    |        | SAHA treatment rep2 | 52,087,886 | 94.61%       | 47,698,851    |
|                    |        | HDACs siRNA #1      | 55,159,758 | 95.13%       | 51,058,654    |
|                    |        | HDACs siRNA #2      | 51,408,635 | 95.81%       | 47,930,292    |
|                    |        | Control siRNA rep1  | 28,449,624 | 94.49%       | 28,172,253    |
|                    |        | Control siRNA rep2  | 23,676,593 | 95.12%       | 23,455,915    |
|                    | morula | P300 siRNA #1       | 52,923,030 | 96.96%       | 50,187,681    |
|                    |        | P300 siRNA #2 rep1  | 54,018,436 | 97.11%       | 51,345,032    |
|                    |        | P300 siRNA #2 rep2  | 71,605,074 | 96.30%       | 71,180,393    |
|                    |        | Control siRNA rep1  | 50,795,132 | 96.91%       | 48,171,637    |
|                    |        | Control siRNA rep2  | 59,106,138 | 96.54%       | 55,475,220    |
|                    |        | Control siRNA rep3  | 48,070,168 | 96.83%       | 47,877,686    |
| Mouse              | 4-cell | Control siRNA rep1  | 37,468,480 | 90.41%       | 27,868,962    |
|                    |        | Control siRNA rep2  | 57,451,848 | 90.93%       | 44,754,283    |
|                    |        | Control siRNA rep3  | 50,703,812 | 83.89%       | 35,033,327    |
|                    |        | Control siRNA rep4  | 44,923,969 | 85.97%       | 31,994,419    |
|                    |        | P300 siRNA #1 rep1  | 44,382,002 | 87.70%       | 32,537,284    |
|                    |        | P300 siRNA #1 rep2  | 32,376,380 | 91.57%       | 24,611,847    |
|                    |        | P300 siRNA #2 rep1  | 51,164,385 | 91.09%       | 38,741,199    |
|                    |        | P300 siRNA #2 rep2  | 48,656,260 | 83.22%       | 33,065,219    |
|                    | 8-cell | Control siRNA rep1  | 39,348,221 | 90.13%       | 28,717,687    |
|                    |        | Control siRNA rep2  | 44,078,527 | 88.39%       | 31,433,126    |
|                    |        | Control siRNA rep3  | 45,507,494 | 94.00%       | 37,318,289    |
|                    |        | Control siRNA rep4  | 62,269,762 | 93.14%       | 50,286,411    |
|                    |        | P300 siRNA #1 rep1  | 31,816,095 | 91.78%       | 25,316,266    |
|                    |        | P300 siRNA #1 rep2  | 33,800,206 | 93.38%       | 26,933,665    |
| P300 siRNA #2 rep1 |        | 34,991,035          | 89.24%     | 25,295,555   |               |
| P300 siRNA #2 rep2 |        | 54,472,321          | 80.78%     | 37,272,015   |               |

1 **Supplementary Table S2 Sequencing and mapping information of RNA-seq**  
2 **data with human and mouse embryos.**  
3

| Stage                  | Strains  | Emb. Num. | Antibody treatment /       | Raw reads  | Mapping rate | Unique read pairs |
|------------------------|----------|-----------|----------------------------|------------|--------------|-------------------|
| 8-cell                 |          | 7         | H3K27ac rep1               | 48,677,512 | 97.68%       | 7,868,779         |
|                        |          | 7         | H3K27ac rep2               | 43,789,438 | 97.63%       | 4,703,602         |
|                        | C57xPWK* | 15        | H3K27ac rep3               | 25,437,522 | 95.15%       | 3,307,559         |
|                        |          |           | Input                      | 44,987,541 | 81.52%       | 21,851,741        |
| oocyte                 |          | 100       | H3K27ac rep1               | 61,748,678 | 85.39%       | 2,866,210         |
|                        |          | 100       | H3K27ac rep2               | 72,115,982 | 88.91%       | 2,386,230         |
|                        |          |           | Input                      | 61,196,650 | 96.57%       | 10,224,575        |
| zygote                 |          | 100       | H3K27ac rep1               | 67,064,234 | 98.79%       | 23,260,997        |
|                        |          | 100       | H3K27ac rep2               | 80,947,435 | 98.83%       | 16,875,059        |
|                        | C57xPWK* | 115       | H3K27ac rep3               | 33,874,753 | 97.84%       | 15,002,433        |
|                        |          |           | Input                      | 67,538,080 | 97.99%       | 13,538,615        |
|                        | C57xPWK* | 172       | H3K9me3 rep1               | 24,104,179 | 92.73%       | 2,121,116         |
|                        | C57xPWK* | 140       | H3K9me3 rep2               | 34,558,216 | 62.49%       | 2,493,852         |
| P300 KD zygote         |          | 50        | H3K27ac rep1, P300 siRNA#1 | 30,084,333 | 98.21%       | 12,564,663        |
|                        |          | 50        | H3K27ac rep2, P300 siRNA#2 | 38,051,184 | 97.13%       | 10,429,070        |
| Late 2-cell            |          | 50        | H3K27ac rep1               | 88,556,403 | 94.77%       | 6,076,030         |
|                        |          | 50        | H3K27ac rep2               | 94,438,534 | 96.31%       | 3,985,965         |
|                        | C57xPWK* | 80        | H3K27ac rep3               | 30,065,051 | 96.56%       | 11,210,820        |
|                        |          |           | Input                      | 81,723,616 | 97.59%       | 14,985,273        |
| late 2-cell + amanitin |          | 25        | H3K27ac rep1               | 16,926,415 | 97.75%       | 10,551,390        |
|                        |          | 25        | H3K27ac rep2               | 18,176,431 | 98.19%       | 12,178,819        |
| late 2-cell + SAHA     | C57xPWK* | 65        | H3K27ac rep1               | 57,973,288 | 97.21%       | 29,911,253        |
|                        | C57xPWK* | 50        | H3K27ac rep2               | 32,369,420 | 96.98%       | 19,737,274        |
| 4-cell                 | C57xPWK* | 25        | H3K27ac rep1               | 29,218,773 | 95.72%       | 4,787,006         |
|                        | C57xPWK* | 25        | H3K27ac rep2               | 30,757,112 | 94.44%       | 3,053,100         |
|                        | C57xPWK* |           | Input                      | 26,501,581 | 97.02%       | 7,066,625         |
| 4-cell + P300KD        |          | 41        | H3K27ac rep1, P300 siRNA#1 | 35,056,763 | 94.48%       | 3,325,778         |
|                        |          | 40        | H3K27ac rep2, P300 siRNA#2 | 35,572,091 | 75.98%       | 8,734,350         |
| morula                 | C57xPWK* | 10        | H3K27ac rep1               | 42,902,648 | 95.13%       | 6,126,948         |
|                        | C57xPWK* | 10        | H3K27ac rep2               | 28,558,500 | 95.38%       | 4,821,436         |
|                        | C57xPWK* |           | Input                      | 32,511,564 | 96.37%       | 7,085,509         |
| blastocyst             | C57xPWK* | 5         | H3K27ac rep1               | 79,510,593 | 94.66%       | 5,092,684         |
|                        | C57xPWK* | 5         | H3K27ac rep2               | 86,512,908 | 94.01%       | 6,992,538         |
|                        | C57xPWK* |           | Input                      | 42,378,257 | 97.50%       | 13,360,793        |

1 \* C57BL/6N females crossed with PWK/PhJ males.

- 1 **Supplementary Table S3 Sequencing and mapping information of mouse**
- 2 **H3K27ac ChIP-seq data.**

| Stage       | Embryo Num. | Antibody     | Raw reads  | Mapping rate | Unique reads |
|-------------|-------------|--------------|------------|--------------|--------------|
| Late 2-cell | 50          | H3K18ac rep1 | 29,666,908 | 97.15%       | 10,618,071   |
|             | 50          | H3K18ac rep2 | 29,181,812 | 96.67%       | 7,862,155    |
|             | 50          | H3K9ac rep1  | 37,717,696 | 96.34%       | 14,267,657   |
|             | 50          | H3K9ac rep2  | 37,169,159 | 96.83%       | 19,395,780   |
| 4-cell      | 25          | H3K18ac rep1 | 29,427,252 | 96.43%       | 10,219,804   |
|             | 25          | H3K18ac rep2 | 28,235,340 | 96.04%       | 9,185,070    |
|             | 25          | H3K9ac rep1  | 25,575,953 | 94.94%       | 3,362,174    |
|             | 25          | H3K9ac rep2  | 26,535,498 | 75.77%       | 602,609      |
| 8-cell      | 25          | H3K18ac rep1 | 31,252,682 | 95.73%       | 10,599,009   |
|             | 25          | H3K18ac rep2 | 32,766,271 | 96.43%       | 8,675,497    |
|             | 25          | H3K9ac rep1  | 33,210,477 | 95.68%       | 3,610,033    |
|             | 25          | H3K9ac rep2  | 36,131,048 | 95.53%       | 4,161,152    |
| morula      | 10          | H3K18ac rep1 | 29,855,773 | 97.07%       | 11,701,420   |
|             | 10          | H3K18ac rep2 | 30,415,943 | 95.34%       | 8,340,302    |
|             | 10          | H3K9ac rep1  | 56,567,715 | 77.61%       | 1,698,482    |
|             | 10          | H3K9ac rep2  | 49,237,990 | 93.26%       | 2,853,586    |
|             | 10          | H3K9ac rep3  | 18,465,717 | 86.73%       | 404,557      |
| blastocyst  | 5           | H3K18ac rep1 | 51,914,292 | 95.63%       | 13,010,020   |
|             | 5           | H3K18ac rep2 | 42,171,427 | 95.37%       | 10,570,992   |
|             | 5           | H3K9ac rep1  | 29,013,088 | 94.80%       | 2,943,047    |
|             | 5           | H3K9ac rep2  | 19,865,300 | 88.11%       | 717,245      |

- 1 **Supplementary Table S4 Sequencing and mapping information of mouse**
- 2 **H3K18ac and H3K9ac ChIP-seq data.**
- 3



- 1 **Supplementary Table S5 GO results of genes with different types of**
- 2 **acetylations in promoters in mouse early embryos.**
